# Supplementary material for: Preparation and Bioevaluation of a Novel 99mTc-Labeled Glucose Derivative Containing Cyclohexane as a Promising Tumor Imaging Agent
Source: Pharmaceuticals (Basel). 2023 Apr 18;16(4):612. doi: 10.3390/ph16040612 (PMC10144323; doi:10.3390/ph16040612)
Supplement: Supplementary file 1 [file pharmaceuticals-16-00612-s001.zip › pharmaceuticals-2294000-supplementary.pdf]

## Supporting information

### **Preparation and Bioevaluation of a Novel $^{99m}\text{Tc}$ -labelled Glucose Derivative Containing Cyclohexane as a Promising Tumour Imaging Agent**

Junhong Feng, Xuran Zhang, Yuhao Jiang, Qing Ruan, Qianna Wang and Junbo Zhang \*

Key Laboratory of Radiopharmaceuticals of Ministry of Education, NMPA Key Laboratory for Research and Evaluation of Radiopharmaceuticals (National Medical Products Administration), College of Chemistry, Beijing Normal University, Beijing 100875, China

\* Correspondence: zhjunbo@bnu.edu.cn

## Content

|                                                          |    |
|----------------------------------------------------------|----|
| Figure S1. $^1\text{H}$ NMR spectrum of Compound 2 ..... | S3 |
| Figure S2. $^1\text{H}$ NMR spectrum of Compound 3 ..... | S3 |
| Figure S3. $^1\text{H}$ NMR spectrum of Compound 4 ..... | S4 |
| Figure S4. $^1\text{H}$ NMR spectrum of CNMCHDG .....    | S4 |
| Figure S5. $^{13}\text{C}$ NMR spectrum of CNMCHDG ..... | S5 |
| Figure S6. HRMS spectrum of CNMCHDG .....                | S5 |

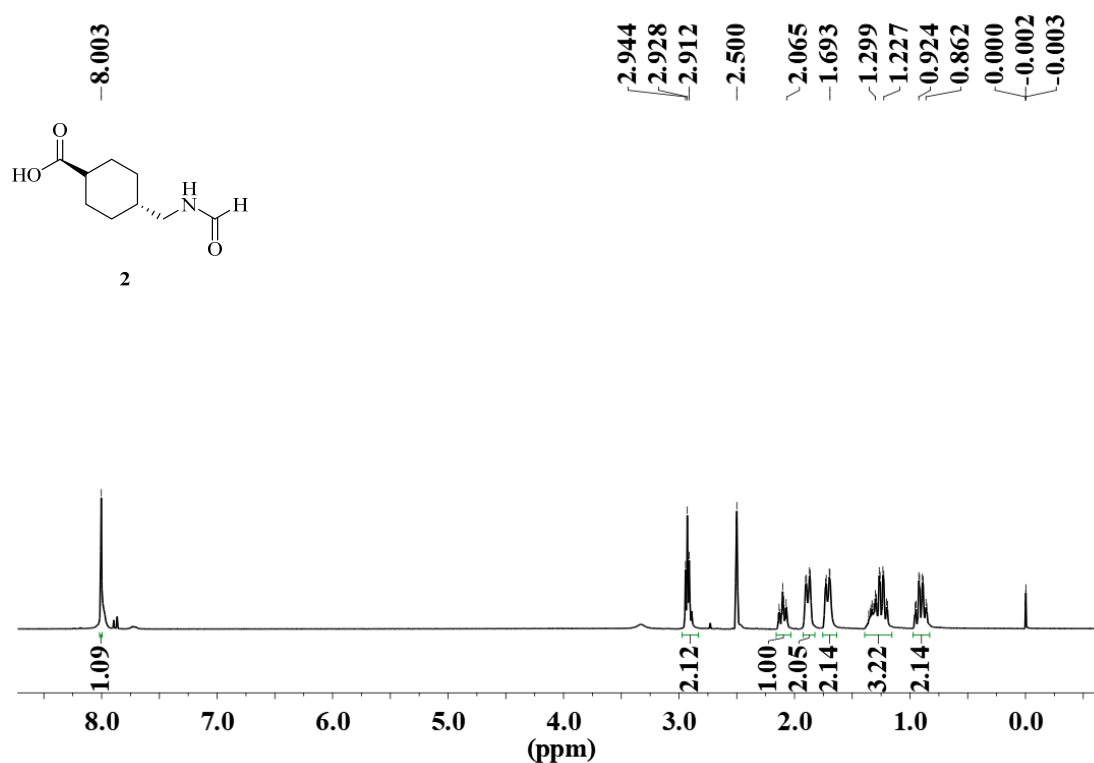Figure S1. <sup>1</sup>H NMR spectrum of Compound 2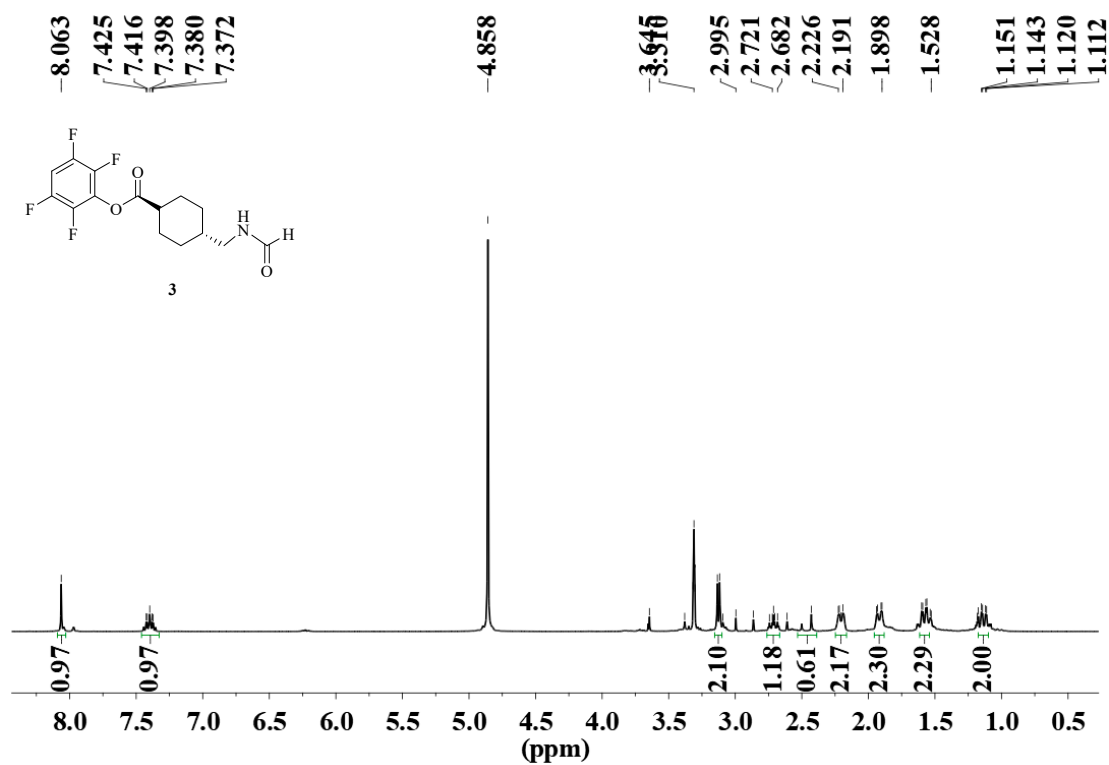Figure S2. <sup>1</sup>H NMR spectrum of Compound 3

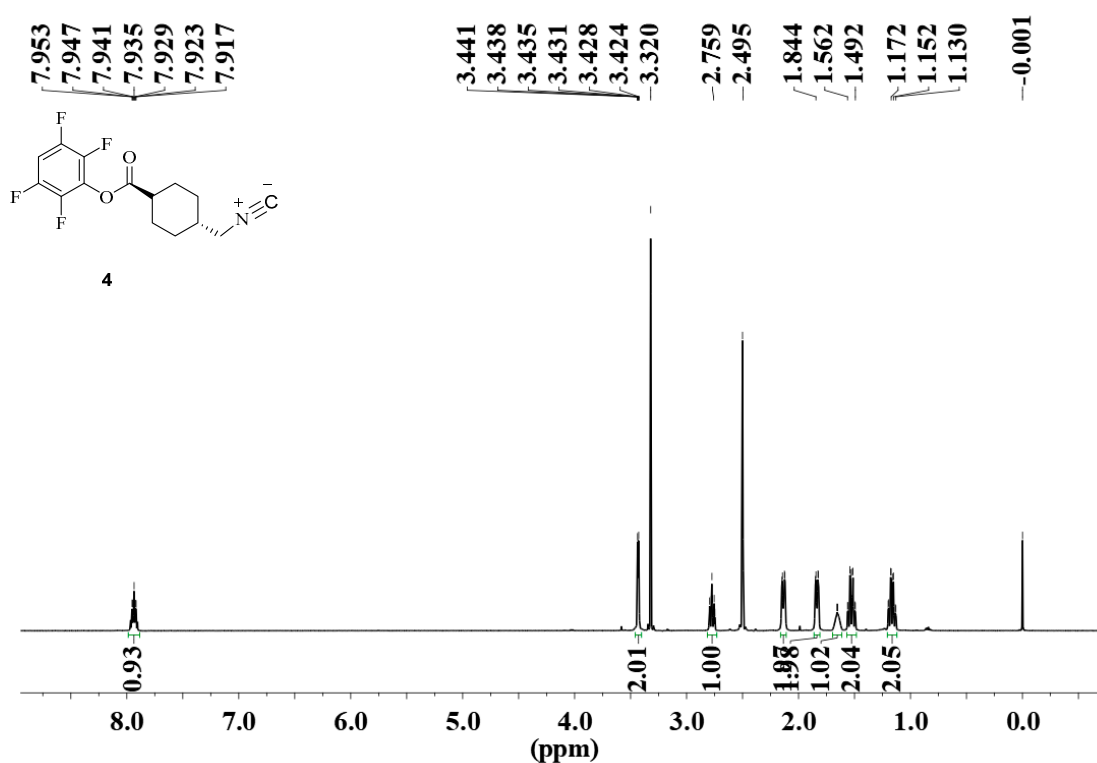Figure S3.  $^1\text{H}$  NMR spectrum of Compound 4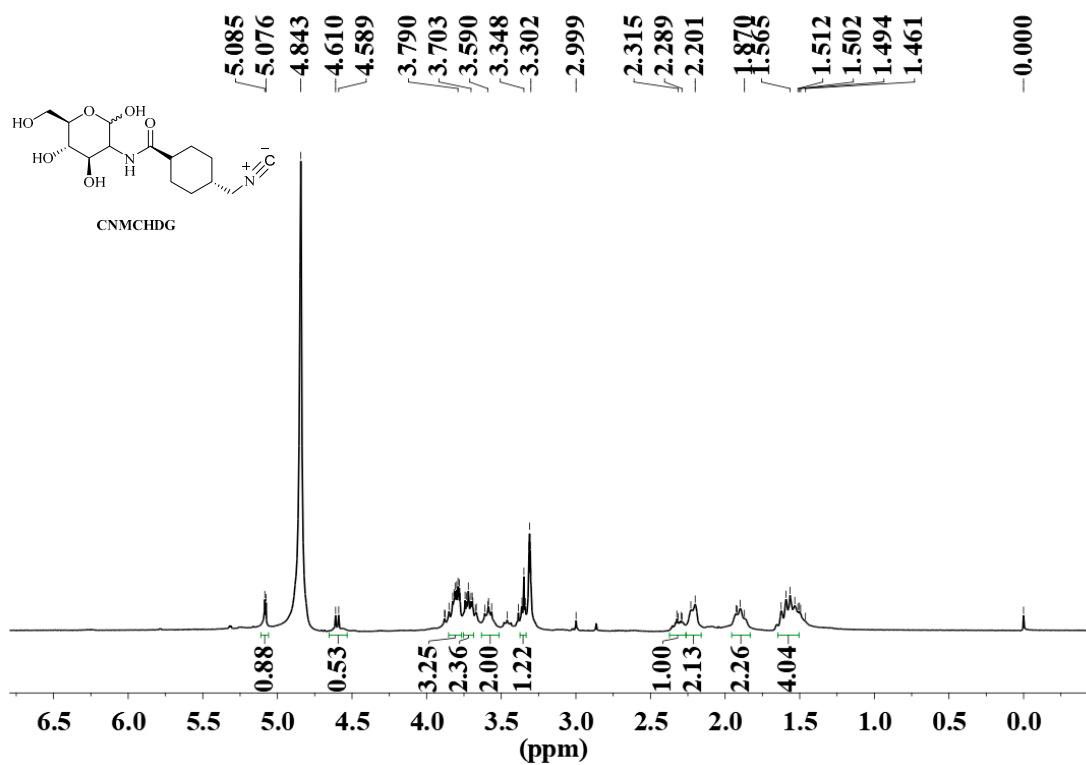Figure S4.  $^1\text{H}$  NMR spectrum of CNMCHDG

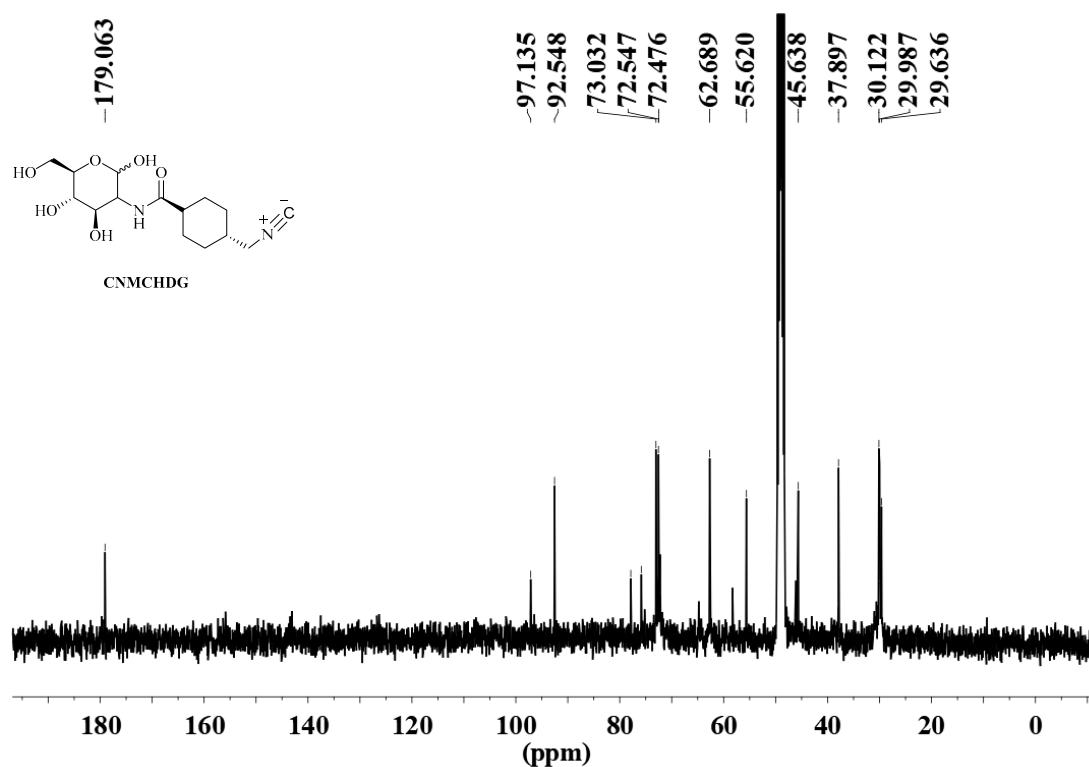Figure S5. <sup>13</sup>C NMR spectrum of CNMCHDG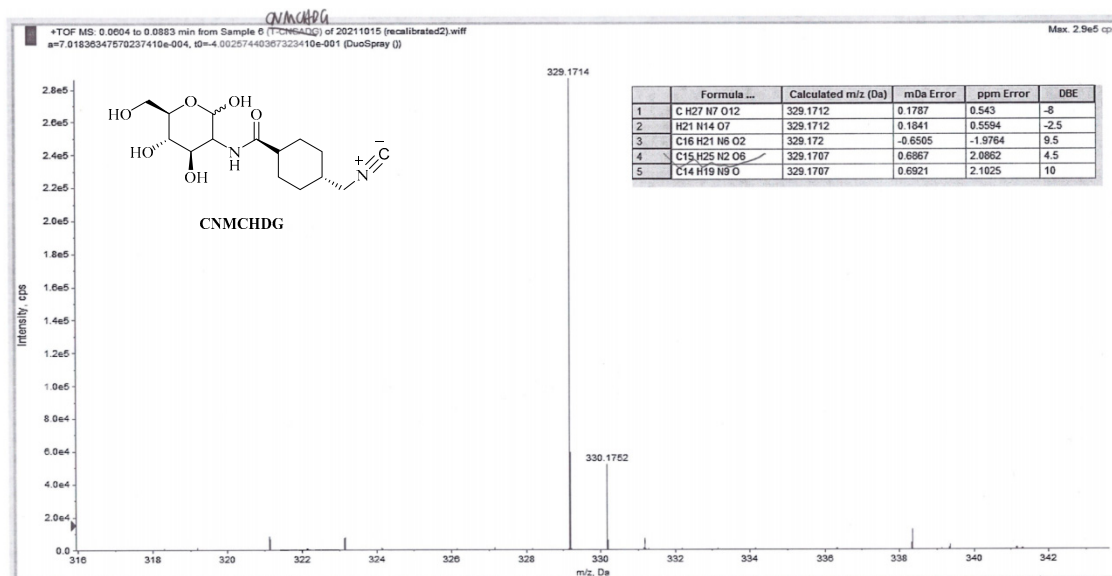

Figure S6. HPMS spectrum of CNMCHDG
